# Supplementary material for: One-Dimensional Iodoantimonate(III) and Iodobismuthate(III) Supramolecular Hybrids with Diiodine: Structural Features, Stability and Optical Properties
Source: MDPI journal article supplement (doi:10.3390/molecules27238487), 2022-12-02
Supplement: s1 [file s1]

**One-dimensional iodoantimonate(III) and iodobismuthate(III) supramolecular hybrids with diiodine: structural features, stability and optical properties**

Nikita A. Korobeynikov, Andrey N. Usoltsev, Pavel A. Abramov, Maxim N. Sokolov and Sergey A. Adonin

**Table S1.** SCXRD Experimental details

|                                                                                                                | <b>(1)</b>                                                                                                         | <b>(3)</b>                                                                                                                                                                               | <b>(4)</b>                                                                                                         |
|----------------------------------------------------------------------------------------------------------------|--------------------------------------------------------------------------------------------------------------------|------------------------------------------------------------------------------------------------------------------------------------------------------------------------------------------|--------------------------------------------------------------------------------------------------------------------|
| Chemical formula                                                                                               | C <sub>12</sub> H <sub>36</sub> I <sub>11</sub> N <sub>3</sub> Sb <sub>2</sub>                                     | C <sub>18</sub> H <sub>24</sub> I <sub>11</sub> N <sub>3</sub> Sb <sub>2</sub>                                                                                                           | C <sub>18</sub> H <sub>24</sub> Bi <sub>2</sub> I <sub>11</sub> N <sub>3</sub>                                     |
| <i>M<sub>r</sub></i>                                                                                           | 1861.84                                                                                                            | 1921.80                                                                                                                                                                                  | 2096.26                                                                                                            |
| Crystal system, space group                                                                                    | Triclinic, <i>P</i> <sup>-</sup> 1                                                                                 | Orthorhombic, <i>Pnma</i>                                                                                                                                                                | Orthorhombic, <i>Pnma</i>                                                                                          |
| <i>a</i> , <i>b</i> , <i>c</i> (Å)                                                                             | 9.8587 (5), 9.9097 (5), 23.8150 (12)                                                                               | 15.8015 (4), 22.9866 (7), 11.1179 (3)                                                                                                                                                    | 15.917 (2), 23.152 (3), 11.1402 (18)                                                                               |
| α, β, γ (°)                                                                                                    | 92.448 (2), 91.697 (2), 118.293 (2)                                                                                | 90, 90, 90                                                                                                                                                                               | 90, 90, 90                                                                                                         |
| <i>V</i> (Å <sup>3</sup> )                                                                                     | 2043.54 (18)                                                                                                       | 4038.27 (19)                                                                                                                                                                             | 4105.4 (11)                                                                                                        |
| <i>Z</i>                                                                                                       | 2                                                                                                                  | 4                                                                                                                                                                                        | 4                                                                                                                  |
| μ (mm <sup>-1</sup> )                                                                                          | 9.64                                                                                                               | 9.76                                                                                                                                                                                     | 16.85                                                                                                              |
| Crystal size (mm)                                                                                              | 0.55 × 0.06 × 0.01                                                                                                 | 0.25 × 0.25 × 0.02                                                                                                                                                                       | 0.13 × 0.05 × 0.03                                                                                                 |
| Diffractometer                                                                                                 | Bruker D8 Venture diffractometer                                                                                   | New Xcalibur, AtlasS2                                                                                                                                                                    | Bruker D8 Venture diffractometer                                                                                   |
| Absorption correction                                                                                          | Multi-scan SADABS 2016/2: Krause, L., Herbst-Irmer, R., Sheldrick G.M. & Stalke D., J. Appl. Cryst. 48 (2015) 3-10 | Multi-scan <i>CrysAlis PRO</i> 1.171.38.41 (Rigaku Oxford Diffraction, 2015) Empirical absorption correction using spherical harmonics, implemented in SCALE3 ABSPACK scaling algorithm. | Multi-scan SADABS 2016/2: Krause, L., Herbst-Irmer, R., Sheldrick G.M. & Stalke D., J. Appl. Cryst. 48 (2015) 3-10 |
| <i>T<sub>min</sub></i> , <i>T<sub>max</sub></i>                                                                | 0.577, 0.745                                                                                                       | 0.876, 1.000                                                                                                                                                                             | 0.455, 0.746                                                                                                       |
| No. of measured, independent and observed [ <i>I</i> > 2σ( <i>I</i> )] reflections                             | 29719, 8224, 7207                                                                                                  | 13094, 4695, 4049                                                                                                                                                                        | 27563, 6955, 5784                                                                                                  |
| <i>R<sub>int</sub></i>                                                                                         | 0.040                                                                                                              | 0.026                                                                                                                                                                                    | 0.049                                                                                                              |
| θ values (°)                                                                                                   | θ <sub>max</sub> = 26.4, θ <sub>min</sub> = 1.7                                                                    | θ <sub>max</sub> = 28.9, θ <sub>min</sub> = 2.0                                                                                                                                          | θ <sub>max</sub> = 31.5, θ <sub>min</sub> = 1.8                                                                    |
| (sin θ/λ) <sub>max</sub> (Å <sup>-1</sup> )                                                                    | 0.625                                                                                                              | 0.680                                                                                                                                                                                    | 0.735                                                                                                              |
| Range of <i>h</i> , <i>k</i> , <i>l</i>                                                                        | -11 ≤ <i>h</i> ≤ 12,<br>-12 ≤ <i>k</i> ≤ 11,<br>-29 ≤ <i>l</i> ≤ 29                                                | -15 ≤ <i>h</i> ≤ 21<br>-22 ≤ <i>k</i> ≤ 31,<br>-14 ≤ <i>l</i> ≤ 14                                                                                                                       | -22 ≤ <i>h</i> ≤ 22,<br>-22 ≤ <i>k</i> ≤ 34,<br>-16 ≤ <i>l</i> ≤ 15                                                |
| <i>R</i> [ <i>F</i> <sup>2</sup> > 2σ( <i>F</i> <sup>2</sup> )], <i>wR</i> ( <i>F</i> <sup>2</sup> ), <i>S</i> | 0.051, 0.125, 1.09                                                                                                 | 0.025, 0.042, 1.07                                                                                                                                                                       | 0.030, 0.060, 1.06                                                                                                 |
| No. of reflections, parameters, restraints                                                                     | 8224, 278, 2                                                                                                       | 4695, 165, 0                                                                                                                                                                             | 6955, 165, 0                                                                                                       |
| H-atom treatment                                                                                               | H-atom parameters constrained                                                                                      | H atoms treated by a mixture of independent and constrained refinement                                                                                                                   | H atoms treated by a mixture of independent and constrained refinement                                             |
| Weighting scheme                                                                                               | $w = 1/[\sigma^2(F_o^2) + 78.1896P]$<br>where $P = (F_o^2 + 2F_c^2)/3$                                             | $w = 1/[\sigma^2(F_o^2) + (0.0118P)^2]$<br>where $P = (F_o^2 + 2F_c^2)/3$                                                                                                                | $w = 1/[\sigma^2(F_o^2) + (0.014P)^2 + 0.0095P]$<br>where $P = (F_o^2 + 2F_c^2)/3$                                 |
| Δρ <sub>max</sub> , Δρ <sub>min</sub> (e Å <sup>-3</sup> )                                                     | 1.67, -1.27                                                                                                        | 0.67, -1.11                                                                                                                                                                              | 1.01, -1.78                                                                                                        |

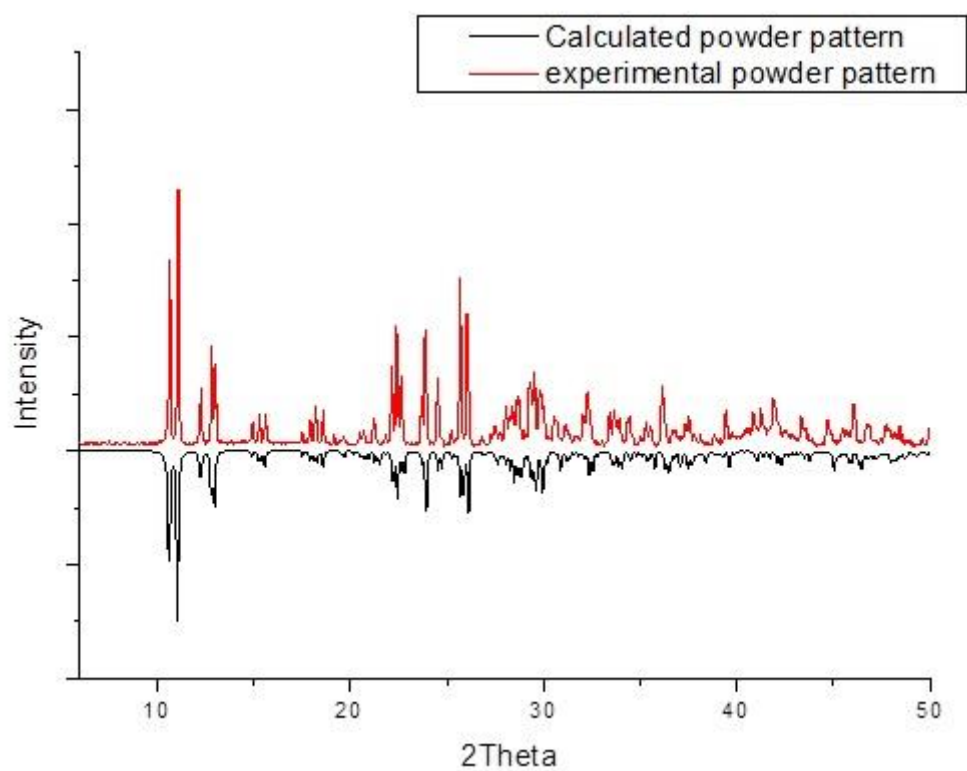

**Figure S1.** PXRD data for **1**

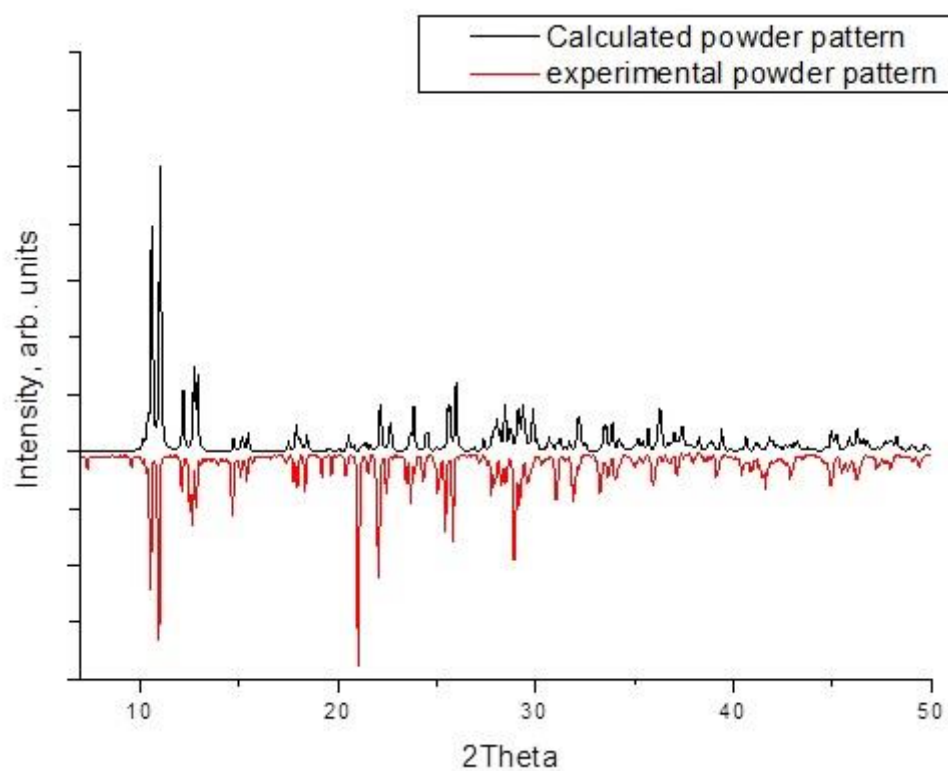

**Figure S2.** PXRD data for **2**

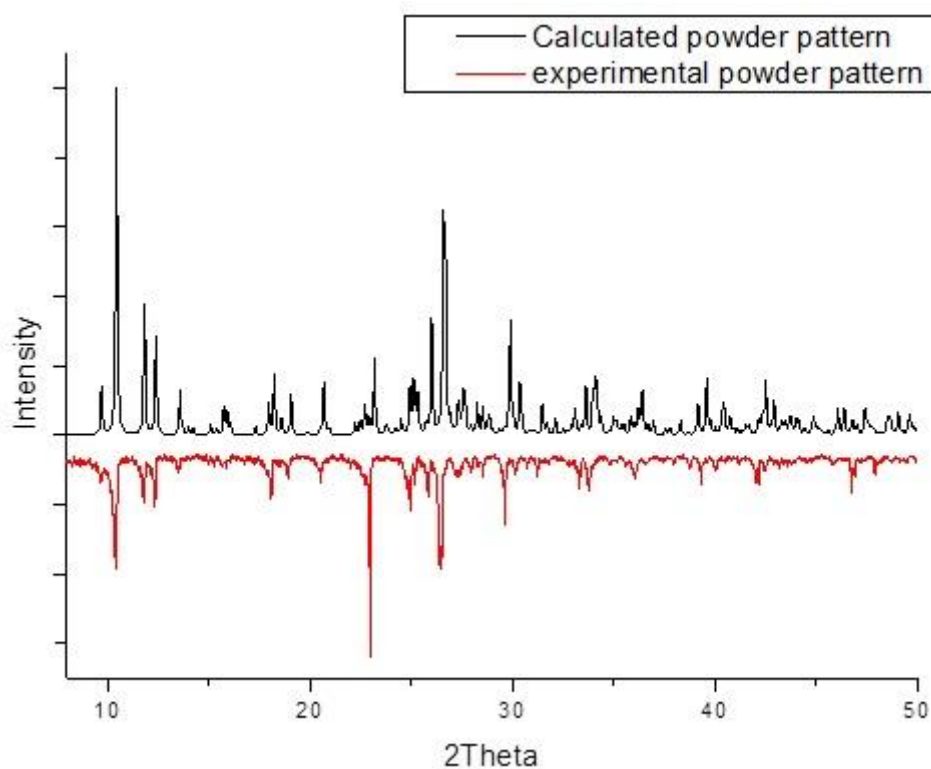

**Figure S3.** PXRD data for **3**

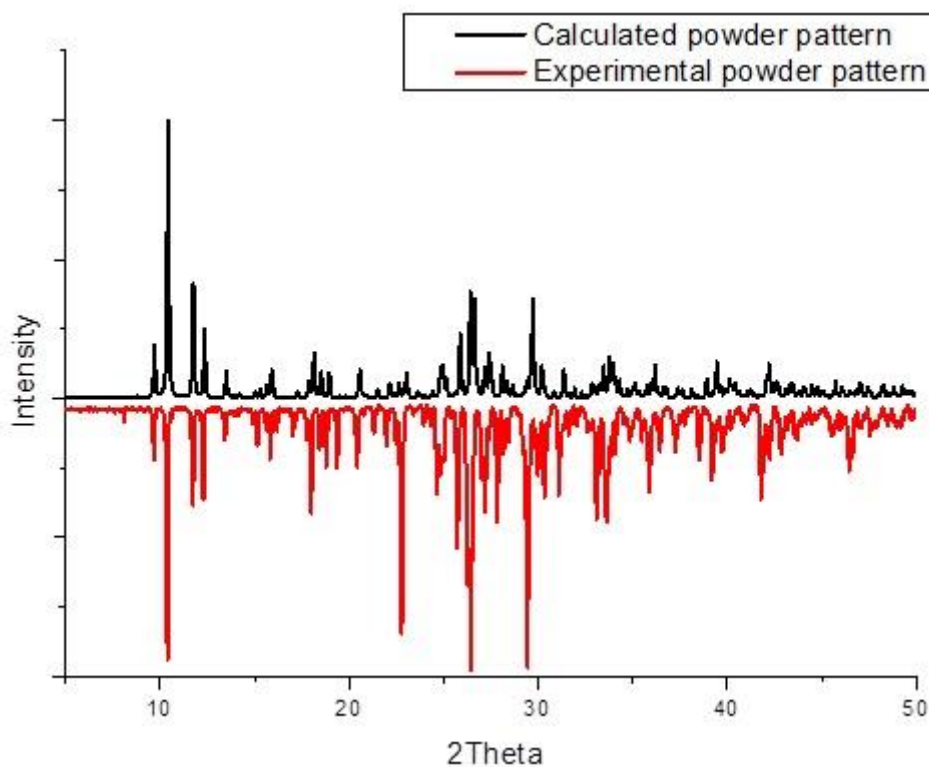

**Figure S4.** PXRD data for **4**

### Raman spectroscopy

Raman spectra were collected using a LabRAM HR Evolution (Horiba) spectrometer with the excitation by the 633 nm line of the He-Ne laser. The spectra at room temperatures were

obtained in the backscattering geometry with a Raman microscope. The laser beam was focused to a diameter of 2 micrometers using a LMPlan FL 50x/0.50 Olympus objective. The spectral resolution was 0.7 cm<sup>-1</sup>. The laser power on the sample surface was about 0.03 mW.

### Diffuse reflectance spectroscopy

Diffuse reflectance spectra were measured on an setup which consists of a Kolibri-2 spectrometer (VMK Optoelektronika, Russia), fiber optic cable QR-400-7 (Ocean Optics, USA), and deuterium–tungsten lamp AvaLight-DHS (Avantes, Netherlands). The reference of 100% reflectance was BaSO<sub>4</sub> powder. The spectra were recorded five times in the wavelength interval of 300–1000 nm and then averaged to reduce the random error.

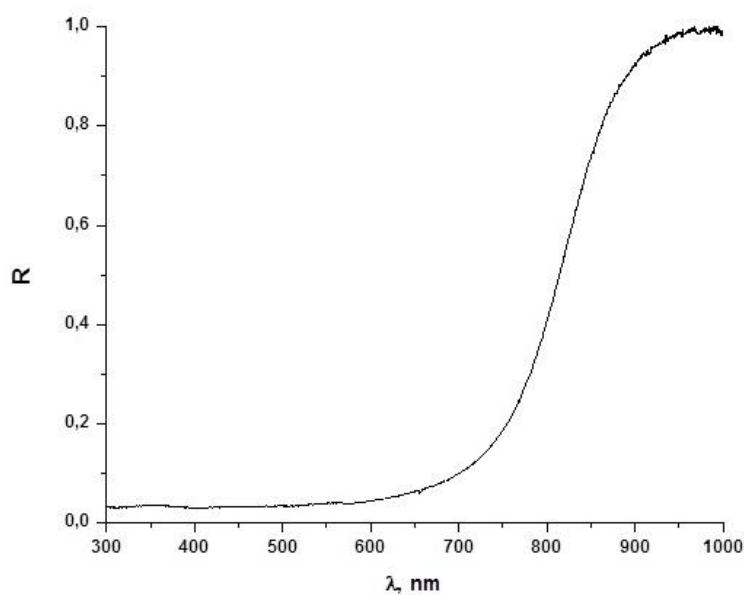

**Figure S5.** Diffuse reflectance spectrum for **2**

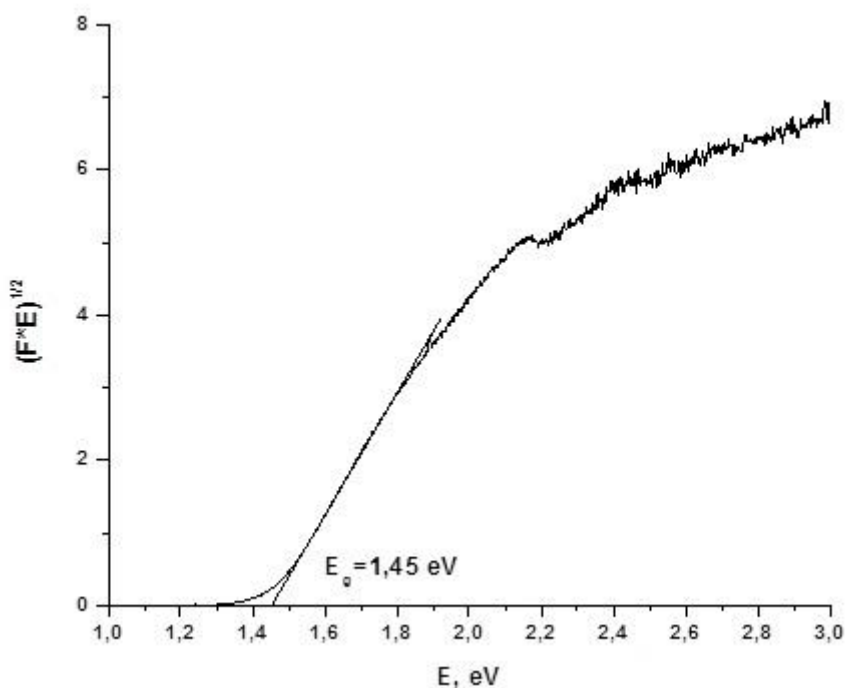

**Figure S6.** Band gap determination for **2**

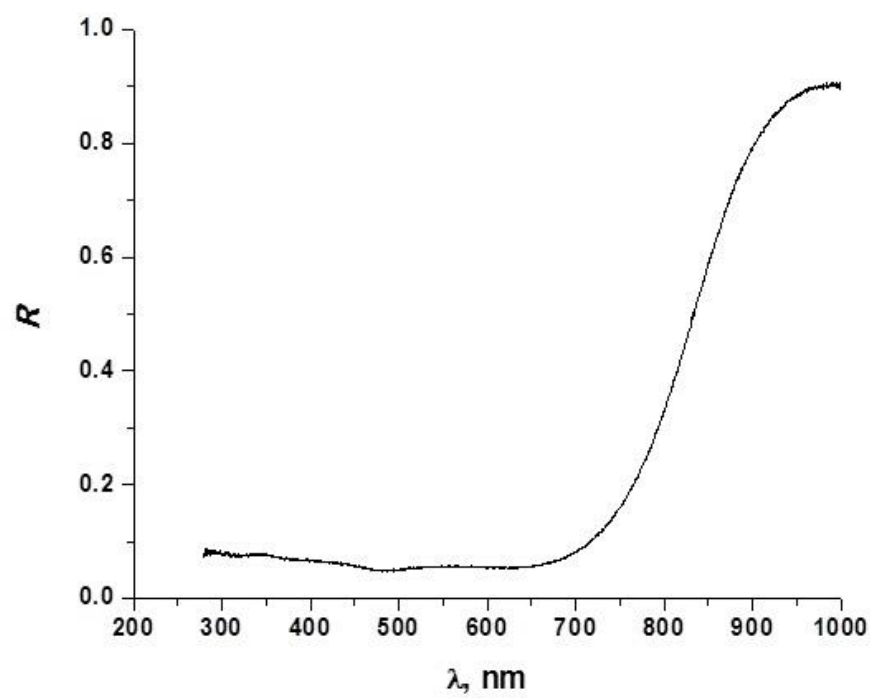

**Figure S7.** Diffuse reflectance spectrum for **3**

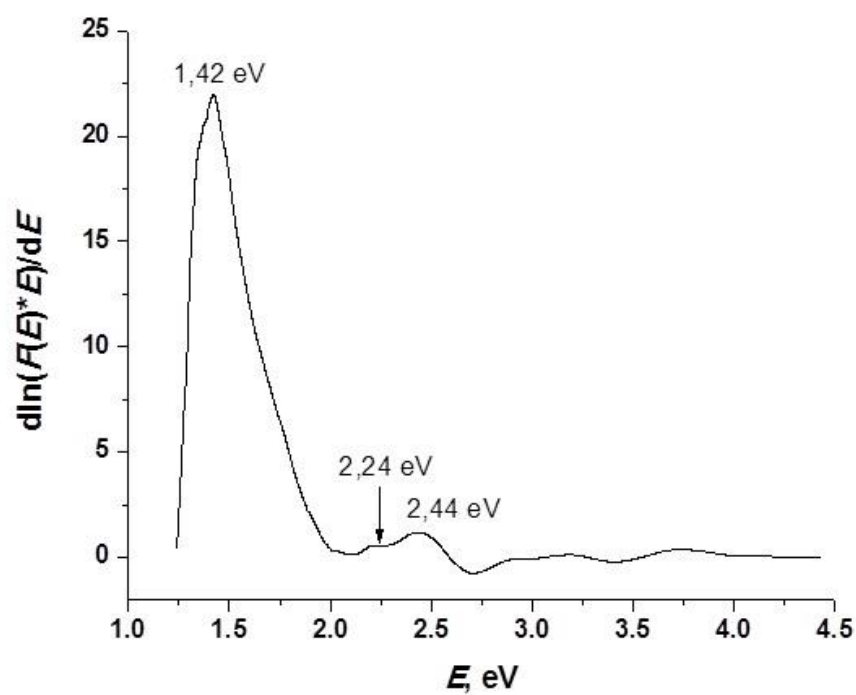

**Figure S8.** Band gap determination for **3**

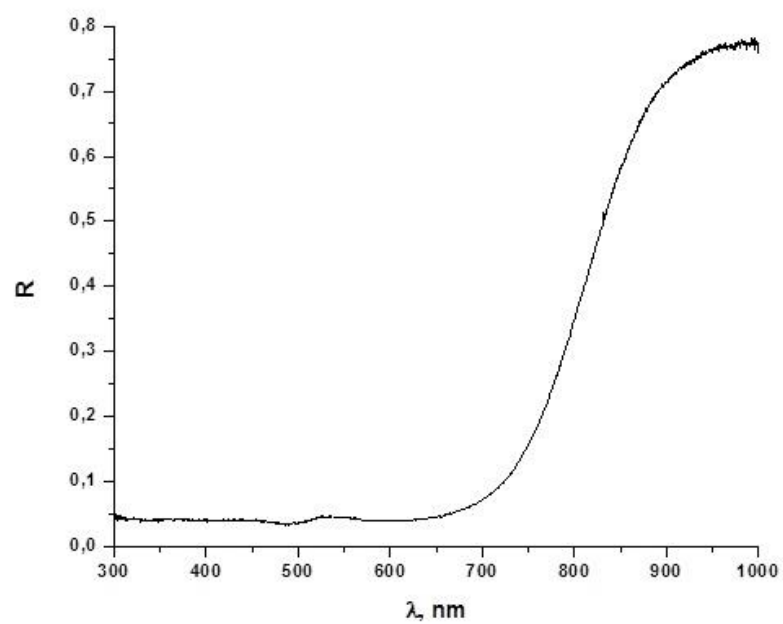

Figure S9. Diffuse reflectance spectrum for **4**

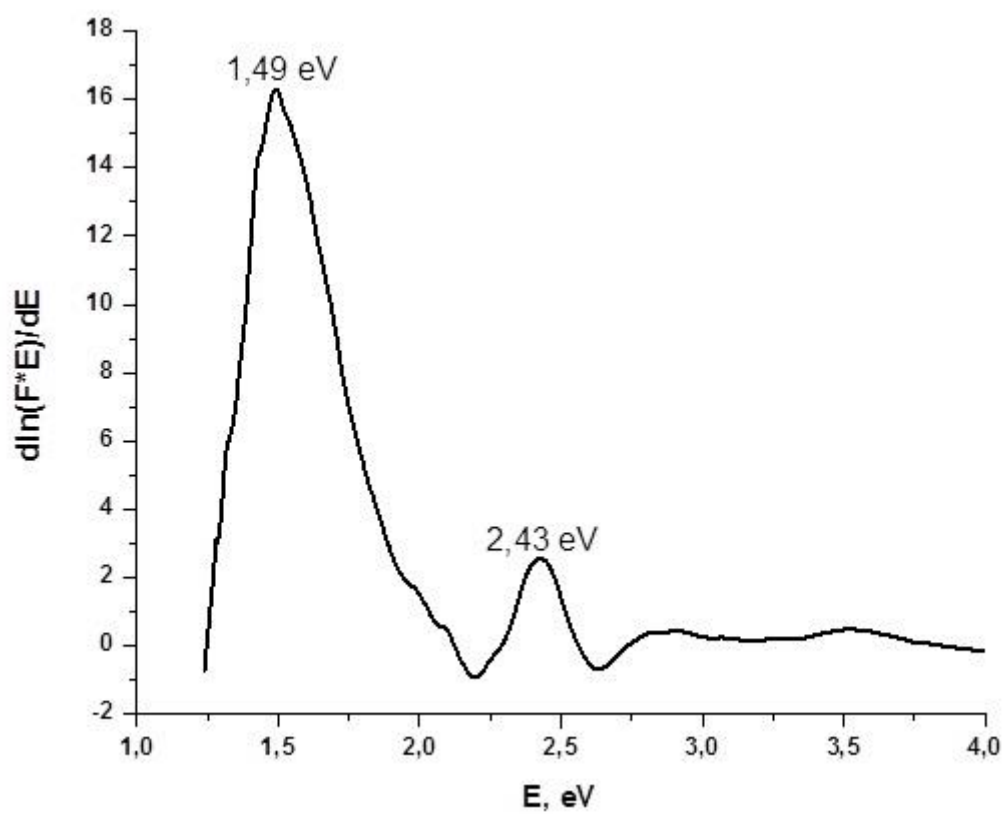

Figure S10. Band gap determination for **4**

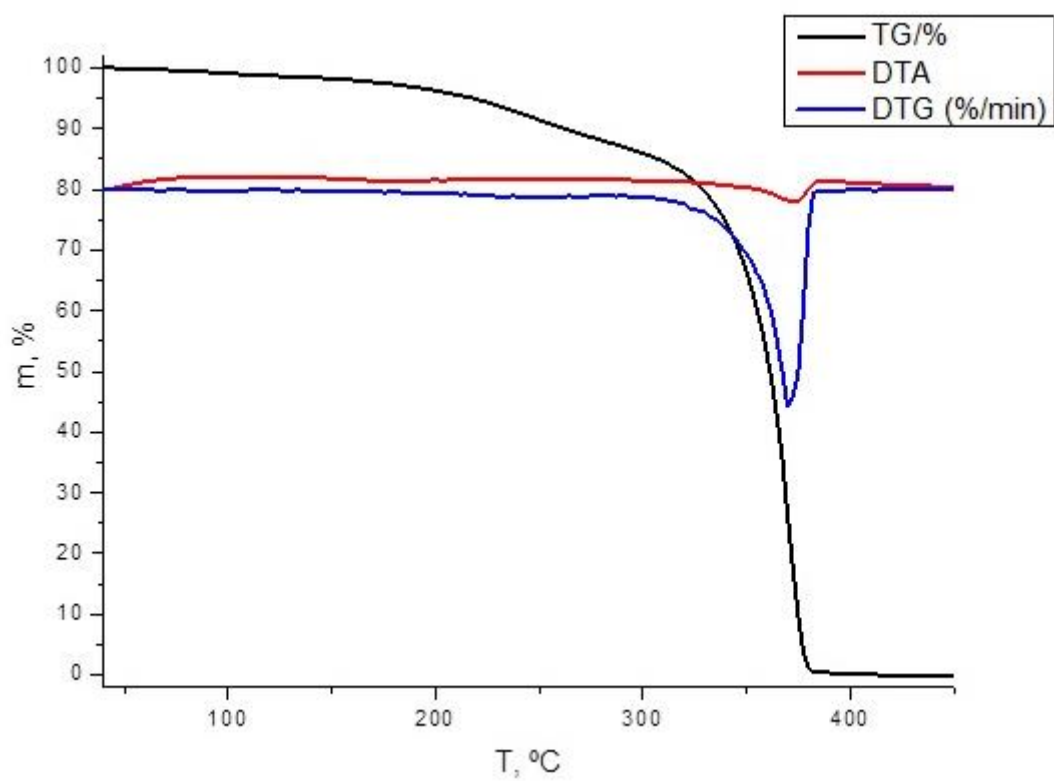

**Figure S11.** TG, DTA and DTG data for **1**

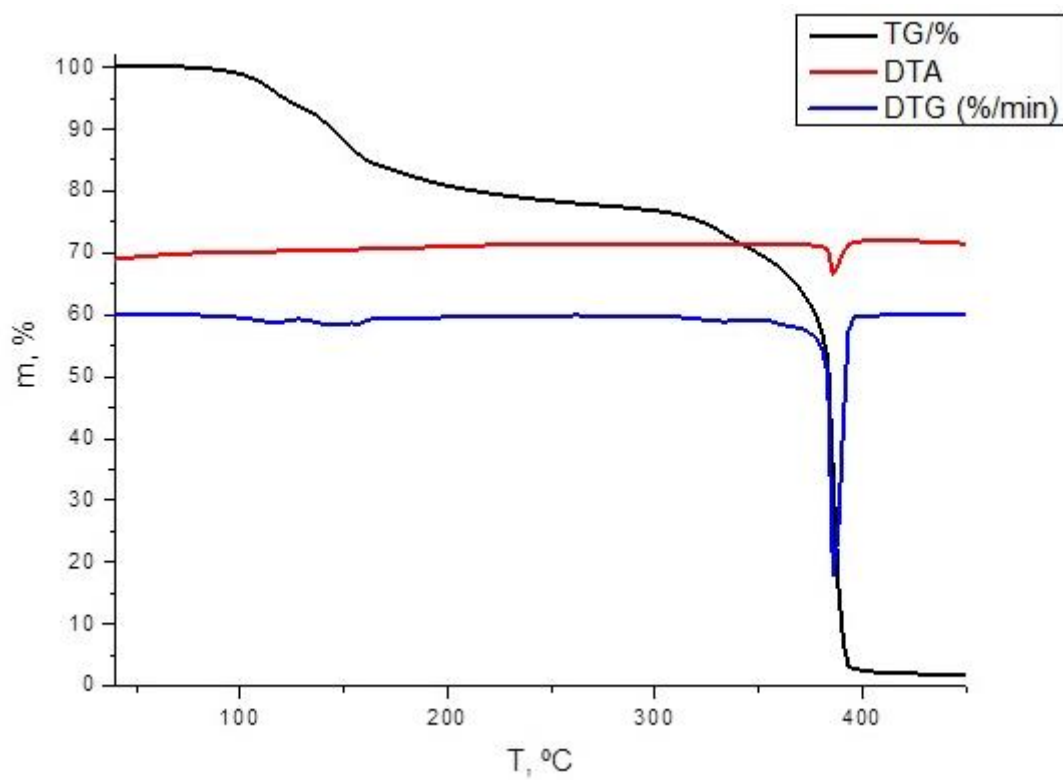

**Figure S12.** TG, DTA and DTG data for **2**

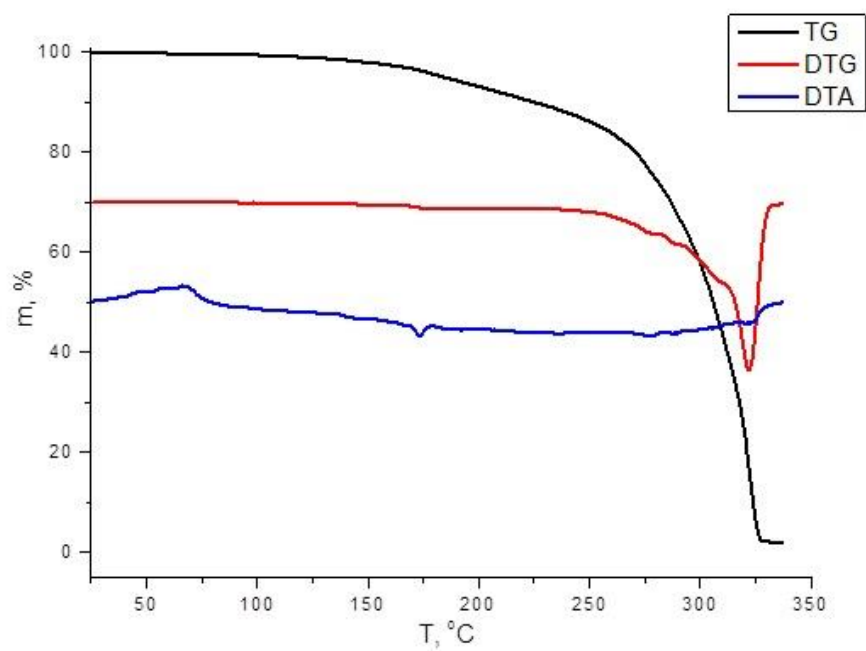

**Figure S13.** TG, DTA and DTG data for **3**

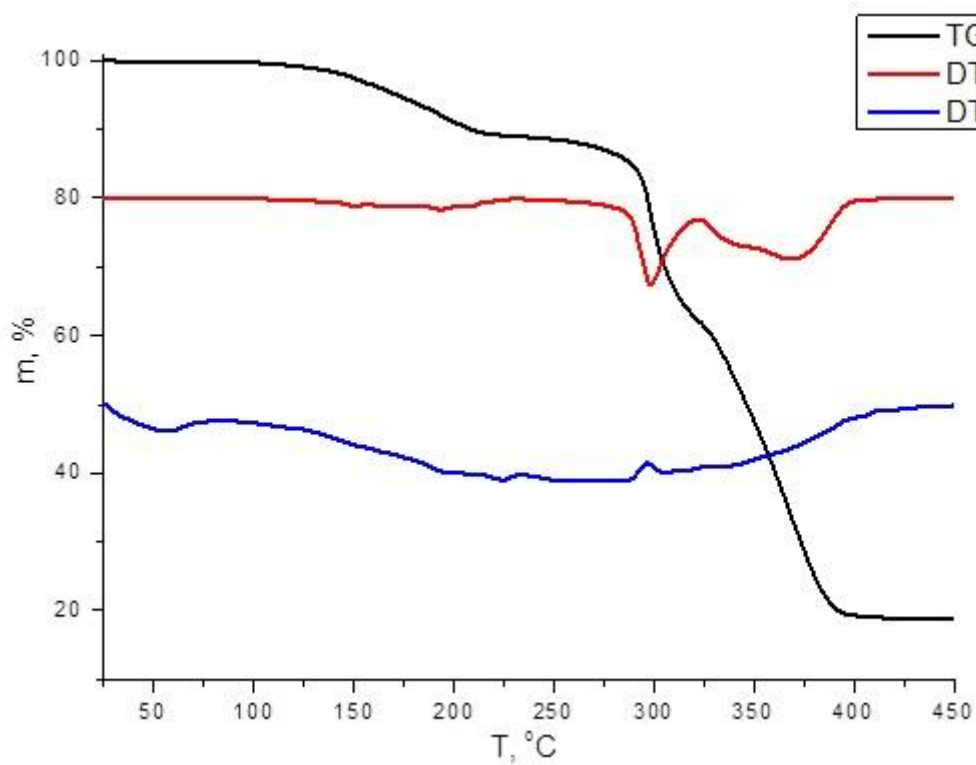

**Figure S14.** TG, DTA and DTG data for **4**
